# Supplementary material for: Supervised Study: Required Independent Research at a Community College Supports Persistence in Science
Source: Atypon-hosted journal article supplement (doi:10.1187/cbe.21-09-0290), 2022-08-22
Supplement: combinedsupmats.pdf [file combinedsupmats.pdf]

# Supplemental Material

*CBE—Life Sciences Education*

Allison *et al.*

**Supplemental Material for Supervised Study: required independent research at a community college supports and persistence in science**

**Anne B. Allison, Virginia V. York, Donna M. Hoefner, Melinda E. Clark, Marlena C. Yost, Joanna R. Vondrasek (corresponding author)**

**Table S1. Correlation matrix of survey factors for paired data.** Pearson correlations for the pre-/post-difference for each pair of factors.

|                                  | <b>Project ownership content</b> | <b>Project ownership emotion</b> | <b>Self-efficacy</b> | <b>Identity</b> | <b>Science community values</b> | <b>Networking</b> |
|----------------------------------|----------------------------------|----------------------------------|----------------------|-----------------|---------------------------------|-------------------|
| <b>Project ownership content</b> | -                                | 0.443                            | 0.350                | 0.437           | 0.462                           | 0.240             |
| <b>Project ownership emotion</b> | -                                | -                                | -0.073               | 0.598           | -0.014                          | 0.264             |
| <b>Self-efficacy</b>             | -                                | -                                | -                    | 0.103           | -0.015                          | 0.673             |
| <b>Identity</b>                  | -                                | -                                | -                    | -               | -0.111                          | 0.033             |
| <b>Science community values</b>  | -                                | -                                | -                    | -               | -                               | 0.338             |

**Table S2. Cronbach's alpha assessment of internal consistency across factors and the surveys as a whole.**

| <b>Cronbach's <math>\alpha</math></b> | <b>POC</b> | <b>POE</b> | <b>SE</b> | <b>SI</b> | <b>SCV</b> | <b>N</b> | <b>Whole sui</b> |
|---------------------------------------|------------|------------|-----------|-----------|------------|----------|------------------|
| <b>pre-survey</b>                     | 0.93       | 0.95       | 0.78      | 0.82      | 0.79       | 0.82     | 0.94             |
| <b>post-survey</b>                    | 0.84       | 0.91       | 0.90      | 0.89      | 0.75       | 0.79     | 0.93             |

**Table S3.** Graduation and transfer outcomes among PITS survey respondents (total n = 34).

|                                | <b>% (n)</b> |
|--------------------------------|--------------|
| <b>Transfer</b>                | 58.8 (20)    |
| <b>Graduate</b>                | 82.4 (28)    |
| <b>Graduate &amp; transfer</b> | 50.0 (17)    |

**Table S4.** Student characteristics among PITS survey respondents (total n = 34).

|                             | <b>Respondents<br/>% (n)</b> |
|-----------------------------|------------------------------|
| <b>Black, Afr. American</b> | 9 (3)                        |
| <b>Hispanic</b>             | 12 (4)                       |
| <b>White</b>                | 68 (23)                      |
| <b>Other</b>                | 12 (4)                       |
| <b>Under 22</b>             | 41 (14)                      |
| <b>Age 23-39</b>            | 56 (19)                      |
| <b>Age 40 or greater</b>    | 6 (2)                        |
| <b>First generation</b>     | 29 (10)                      |
| <b>Pell received</b>        | 32 (11)                      |

**Table S5.** Race and ethnicity among students who transferred, completed a four-year degree.

| <b>Category</b>                                       | <b><u>SCI</u></b> | <b><u>sci-LA</u></b> | <b><u>sci-GS</u></b> | <b><u>TOTAL</u></b> |
|-------------------------------------------------------|-------------------|----------------------|----------------------|---------------------|
| <b># white/Asian transfer students in dataset</b>     | 104               | 68                   | 123                  | 295                 |
| <b># non-white/Asian transfer students in dataset</b> | 14                | 13                   | 23                   | 50                  |
| <b>% white/Asian in dataset</b>                       | 88.1%             | 84.0%                | 84.2%                | 85.5%               |
| <b>% non-white/Asian in dataset</b>                   | 11.9%             | 16.0%                | 15.8%                | 14.5%               |
|                                                       |                   |                      |                      |                     |
| <b>white/Asian bachelors</b>                          | 66                | 43                   | 62                   | 171                 |
| <b>non-white/Asian bachelors</b>                      | 8                 | 7                    | 9                    | 24                  |
| <b>% white/Asian bachelors</b>                        | 89.2%             | 86.0%                | 87.3%                | 87.7%               |
| <b>% non-white/Asian bachelors</b>                    | 10.8%             | 14.0%                | 12.7%                | 12.3%               |
|                                                       |                   |                      |                      |                     |
| <b>white/Asian SCIENCE majors</b>                     | 40                | 14                   | 9                    | 63                  |
| <b>non-white/Asian SCIENCE majors</b>                 | 5                 | 1                    | 3                    | 9                   |
| <b>% white/Asian SCIENCE majors</b>                   | 88.9%             | 93.3%                | 75.0%                | 87.5%               |
| <b>% non-white/Asian SCIENCE majors</b>               | 11.1%             | 6.7%                 | 33.3%                | 12.5%               |

|                                             |      |      |      |      |
|---------------------------------------------|------|------|------|------|
|                                             |      |      |      |      |
| <b>white/Asian NON-science majors</b>       | 26   | 29   | 53   | 108  |
| <b>non-white/Asian NON-science majors</b>   | 3    | 6    | 6    | 15   |
| <b>% white/Asian NON-science majors</b>     | 89.7 | 82.9 | 89.8 | 87.8 |
| <b>% non-white/Asian NON-science majors</b> | 10.3 | 17.1 | 10.2 | 12.2 |
|                                             |      |      |      |      |
| <b>white/Asian noncompleters</b>            | 38   | 14   | 62   | 114  |
| <b>non-white/Asian noncompleters</b>        | 6    | 6    | 14   | 26   |
| <b>% white/Asian noncompleters</b>          | 86.4 | 70.0 | 81.6 | 81.4 |
| <b>% non-white/Asian noncompleters</b>      | 13.6 | 30.0 | 18.4 | 18.6 |

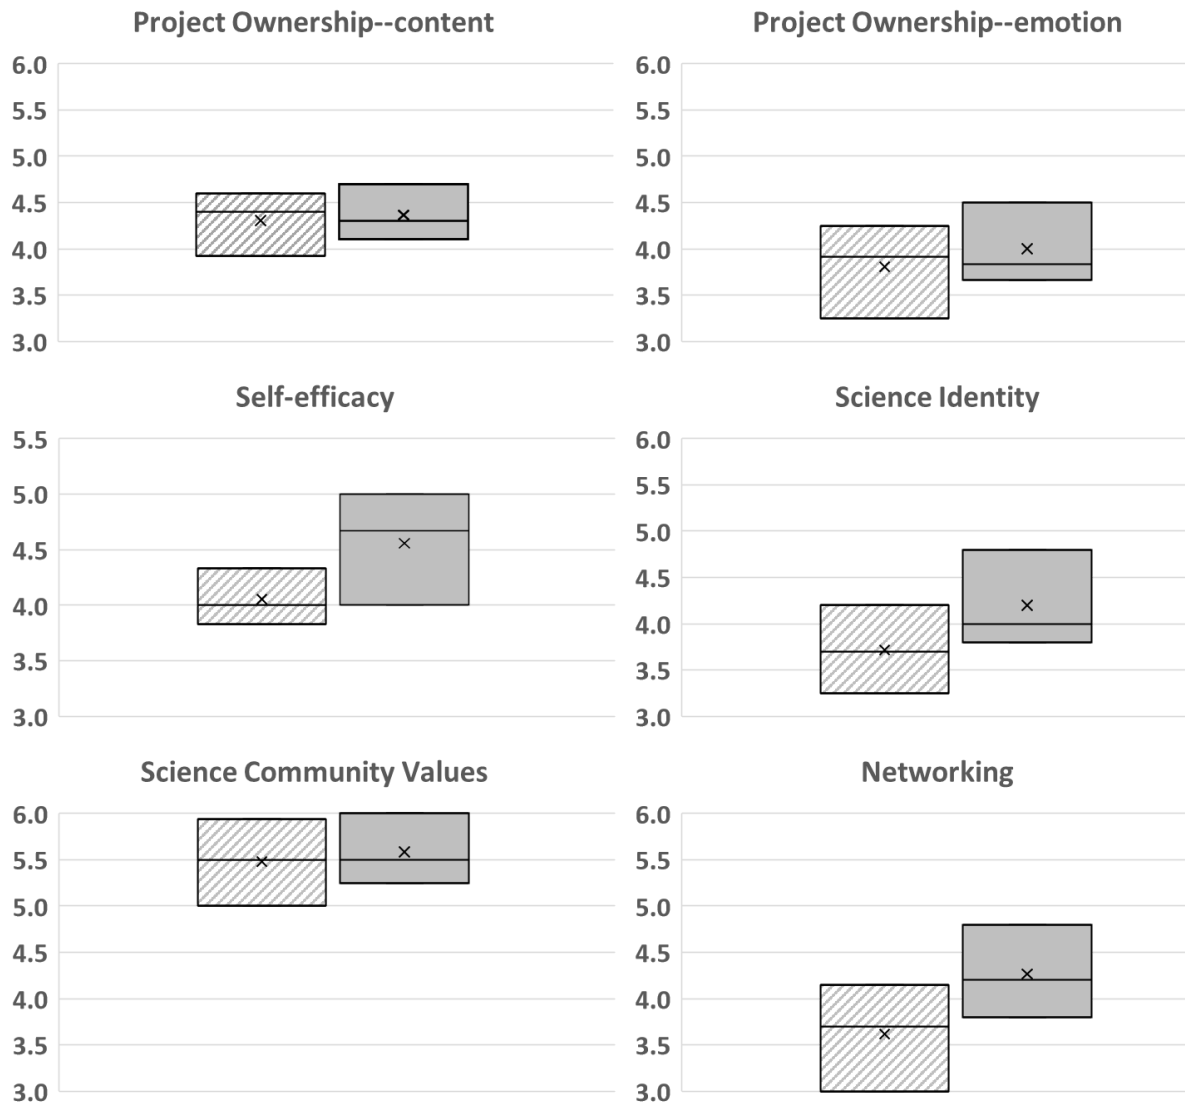

**Figure S1. Aggregated pre-post quartile distributions by survey factor.** Pre-survey (striped, n=22) and post-survey (solid, n=29) responses shown for six survey factors. Mean (X), median (middle bar), and lower and upper quartiles are shown. Survey factors are on a five-point scale from one (strongly disagree) to five (strongly agree) except Science Community Values which is on a six-point scale from one (not like me at all) to six (very much like me).

**Appendix 1: Curriculum sheets for the Science, Liberal Arts, and General Studies Programs at PVCC.**

Students in the Science, Liberal Arts, and General Studies degree programs take a similar set of courses as shown in the following curriculum sheets. In this study, students in the Liberal Arts or General Studies programs were identified as “science-oriented” if they had completed the introductory course sequence in biology and/or chemistry (BIO 101 & 102 and/or CHM 111 & 112), representing the closest comparison groups to PVCC Science students with a similar curricular path with the exception of the Supervised Study course. Only Science students are eligible for and required to take Supervised Study.

**Physical & Natural Sciences**

**Associate of Science**

Code: 880

Transfer Program

Student Name: \_\_\_\_\_ Student ID Number: \_\_\_\_\_

| DEVELOPMENTAL COURSES (IF APPLICABLE) | REQUIRED COURSES     | COURSE DESCRIPTION                                        | CREDITS | PLAN TO TAKE | GRADE |
|---------------------------------------|----------------------|-----------------------------------------------------------|---------|--------------|-------|
|                                       | SDV 100              | College Success Skills                                    | 1       |              |       |
|                                       | ENG 111              | College Composition I                                     | 3       |              |       |
|                                       | ENG 112              | College Composition II                                    | 3       |              |       |
|                                       | HIS ____             | History Elective <sup>7</sup>                             | 3       |              |       |
|                                       | HIS ____             | History Elective <sup>7</sup>                             | 3       |              |       |
|                                       | MTH ____             | Mathematics Elective <sup>5</sup>                         | 3-5     |              |       |
|                                       | MTH ____             | Mathematics Elective <sup>5</sup>                         | 3-5     |              |       |
|                                       | BIO/CHM/PHY/GOL/ 299 | Supervised Study in Science                               | 2       |              |       |
|                                       | CHM 111              | College Chemistry I                                       | 4       |              |       |
|                                       | CHM 112              | College Chemistry II                                      | 4       |              |       |
|                                       | _____                | Science w/Laboratory Elective <sup>1,2,3,4</sup>          | 4       |              |       |
|                                       | _____                | Science w/Laboratory Elective <sup>1,2,3,4</sup>          | 4       |              |       |
|                                       | _____                | Mathematics or Science w/Laboratory Elective <sup>1</sup> | 4-5     |              |       |
|                                       | _____                | Mathematics or Science w/Laboratory Elective <sup>1</sup> | 4-5     |              |       |
|                                       | _____                | Mathematics or Science w/Laboratory Elective <sup>1</sup> | 4-5     |              |       |
|                                       | ITE 119 or CSC 110   | Information Literacy or Introduction to Computing         | 3       |              |       |
|                                       | _____                | Humanities Elective <sup>5,6</sup>                        | 3       |              |       |
|                                       | _____                | Humanities Elective <sup>5,6</sup>                        | 3       |              |       |
|                                       | _____                | Social Science Elective <sup>5</sup>                      | 3       |              |       |

**Total Minimum Credits to Complete the A.S. Degree in Science = 61**

**Liberal Arts**  
**Associate of Arts**  
 Code: 648  
 Transfer Program

Student Name: \_\_\_\_\_ Student ID Number: \_\_\_\_\_

| DEVELOPMENTAL COURSES (IF APPLICABLE) | REQUIRED COURSES                                                    | COURSE DESCRIPTION                         | CREDITS | PLAN TO TAKE | GRADE |
|---------------------------------------|---------------------------------------------------------------------|--------------------------------------------|---------|--------------|-------|
|                                       | SDV 100                                                             | College Success Skills                     | 1       |              |       |
|                                       | ENG 111                                                             | College Composition I                      | 3       |              |       |
|                                       | ENG 112                                                             | College Composition II                     | 3       |              |       |
|                                       | ENG ____                                                            | Literature Transfer Elective <sup>3</sup>  | 3       |              |       |
|                                       | HIS ____                                                            | History Elective <sup>6</sup>              | 3       |              |       |
|                                       | HIS ____                                                            | History Elective <sup>6</sup>              | 3       |              |       |
|                                       | MTH ____                                                            | Mathematics Elective <sup>1</sup>          | 3       |              |       |
|                                       | MTH ____                                                            | Mathematics Elective <sup>1</sup>          | 3       |              |       |
|                                       | ____ 101                                                            | Foreign Language Elective <sup>2</sup>     | 3-4     |              |       |
|                                       | ____ 102                                                            | Foreign Language Elective <sup>2</sup>     | 3-4     |              |       |
|                                       | ____ 201                                                            | Foreign Language Elective <sup>2</sup>     | 3       |              |       |
|                                       | ____ 202                                                            | Foreign Language Elective <sup>2</sup>     | 3       |              |       |
|                                       | ITE 119/CSC 110/ITE 120                                             | Information Literacy                       | 3       |              |       |
|                                       | HLT/PED                                                             | Health or Physical Education Elective      | 1       |              |       |
|                                       | ____                                                                | Transfer Elective <sup>5</sup>             | 3       |              |       |
|                                       | ____                                                                | Transfer Elective <sup>5</sup>             | 3       |              |       |
|                                       | ____                                                                | Social Science Elective <sup>1</sup>       | 3       |              |       |
|                                       | ____                                                                | Social Science Elective <sup>1</sup>       | 3       |              |       |
|                                       | Science-oriented students complete BIO 101 & 102 and/or CHM 111&112 | Science w/Laboratory Elective <sup>1</sup> | 4       |              |       |
|                                       |                                                                     | Science w/Laboratory Elective <sup>1</sup> | 4       |              |       |
|                                       |                                                                     | Humanities Elective <sup>1,4</sup>         | 3       |              |       |

**Total Minimum Credits to Complete the A.A. Degree in Liberal Arts = 61 Credits**



**General Studies**  
**Associate of Science**  
 Code: 699  
 Transfer Program

Student Name: \_\_\_\_\_ Student ID Number: \_\_\_\_\_

| DEVELOPMENTAL COURSES (IF APPLICABLE) | REQUIRED COURSES                                                       | COURSE DESCRIPTION                                                                           | CREDITS | PLAN TO TAKE | GRADE |
|---------------------------------------|------------------------------------------------------------------------|----------------------------------------------------------------------------------------------|---------|--------------|-------|
|                                       | SDV 100                                                                | College Success Skills                                                                       | 1       |              |       |
|                                       | ENG 111                                                                | College Composition I                                                                        | 3       |              |       |
|                                       | ENG 112                                                                | College Composition II                                                                       | 3       |              |       |
|                                       | HIS ____                                                               | History Elective <sup>5</sup>                                                                | 3       |              |       |
|                                       | HIS ____                                                               | History Elective <sup>5</sup>                                                                | 3       |              |       |
|                                       | CST 100                                                                | Principles of Public Speaking                                                                | 3       |              |       |
|                                       | ITE 119 or<br>ITE 120 or<br>CSC 110                                    | Information Literacy or<br>Principles of Information Systems or<br>Introduction to Computing | 3       |              |       |
|                                       | HUM ____                                                               | Humanities Core Course <sup>3</sup>                                                          | 3       |              |       |
|                                       | HUM ____                                                               | Humanities Core Course <sup>3</sup>                                                          | 3       |              |       |
|                                       | ENG ____                                                               | Literature Transfer Elective <sup>4</sup>                                                    | 3       |              |       |
|                                       | MTH ____                                                               | Mathematics Elective <sup>1</sup>                                                            | 3       |              |       |
|                                       | MTH ____ or                                                            | Mathematics Elective or<br>Transfer Elective                                                 | 3       |              |       |
|                                       | Science-oriented students complete BIO<br>101 & 102 and/or CHM 111&112 | Science w/Laboratory Elective <sup>1</sup>                                                   | 4       |              |       |
|                                       |                                                                        | Science w/Laboratory Elective <sup>1</sup>                                                   | 4       |              |       |
|                                       | _____                                                                  | Social Science Elective                                                                      | 3       |              |       |
|                                       | _____                                                                  | Social Science Elective <sup>1</sup>                                                         | 3       |              |       |
|                                       | _____                                                                  | Social Science Elective <sup>1</sup> or<br>Transfer Elective <sup>2</sup>                    | 3       |              |       |
|                                       | _____                                                                  | Transfer Elective <sup>2</sup>                                                               | 3       |              |       |
|                                       | _____                                                                  | Transfer Elective <sup>2</sup>                                                               | 3       |              |       |
|                                       | _____                                                                  | Transfer Elective <sup>2</sup>                                                               | 3       |              |       |
|                                       | _____                                                                  | Transfer Elective <sup>2</sup>                                                               | 3       |              |       |

**Total Minimum Credits to Complete the A.S. Degree in General Studies = 63**

## Appendix 2: PVCC Science Program Student Learning Outcomes and Assessments

| <p>PVCC Science Program</p> <p>Student Learning Outcome</p>               | <p>Assessment Results Summary</p>                                                                                                                                                                  |
|---------------------------------------------------------------------------|----------------------------------------------------------------------------------------------------------------------------------------------------------------------------------------------------|
| <p><b>SLO 1: Apply Scientific Knowledge in Everyday Life</b></p>          | <p>Supervised Study proposal requires student to articulate rational for the project to real life</p>                                                                                              |
| <p><b>SLO 2: Apply Specific Math Concepts</b></p>                         | <p>In Supervised Study, students must identify and use appropriate statistical analysis</p>                                                                                                        |
| <p><b>SLO 3: Basic Lab Safety Procedures</b></p>                          | <p>Supervised Study research involves safety training, planning, and application of relevant safety measures in data collection</p>                                                                |
| <p><b>SLO 4: Integrate Scientific Principles</b></p>                      | <p>Demonstrated in Supervised Study proposal and independent research project</p>                                                                                                                  |
| <p><b>SLO 5: Demonstrate knowledge of Basic Scientific Principles</b></p> | <p>Final exams and lab tests/projects in all lab science and Supervised Study courses</p>                                                                                                          |
| <p><b>SLO 6: Organize and Communicate Scientific Data</b></p>             | <p>Construct poster identifying all elements of scientific method including a written discussion and summary sections and then present this process orally during a formal poster presentation</p> |
| <p><b>SLO 7: Scientific Inquiry</b></p>                                   | <p>Demonstrated in Supervised Study research</p>                                                                                                                                                   |
| <p><b>SLO 8: Work as a Member of a Scientific Team</b></p>                | <p>Demonstrated in Supervised Study learning community</p>                                                                                                                                         |

### **Appendix 3: Supervised Study Syllabus (Fall 2021)**

Note: a living document that is updated regularly can be viewed at <https://doi.org/10.17605/OSF.IO/3XSCM>

#### **Science 299 Supervised Study Syllabus Fall 2021**

**(PHY-, BIO-, CHM-, GOL-299)**

**Fridays 12:00-12:50pm**

**Keats Rm. 209**

#### **Welcome**

Welcome to Science 299! This 2-credit capstone course is required for the Associates degree in Science at PVCC. In this course, you will use the knowledge and skills you have learned throughout the Science program to design and conduct your own research project. You will communicate weekly with a faculty mentor in your area of academic interest (geology, chemistry, biology, or physics). Those of you doing projects in biology or chemistry will also be paired with a lab manager who will offer some guidance in the lab. At the beginning of the semester, you will write and revise a project proposal. At the end of the semester, you will write an abstract and create a poster that you will present at a scientific poster session open to the PVCC community and the public. The opportunity to do your own research early in your college career is somewhat rare, whether one is at a community college or a four-year institution. Students who have taken this course report that it helped them with transfer, jobs, personal skills such as time management, and more. You will have a chance to interact with a couple recent Science 299 alumni this semester, and we hope you will keep in touch with the sciences at PVCC when you graduate!

#### **Contact Information**

**Course Coordinators & Instructors:** Professor A & Professor B

**Email:** \_\_\_\_\_ & \_\_\_\_\_

**Division:** Health and Life Sciences & Business, Mathematics & Technology

\*Please contact Dr. \_\_\_\_\_ with questions about course logistics, policies, etc.

When you have specific questions about your project, it is best to contact your faculty mentor. More general questions about writing proposals, managing your research, making a scientific poster, etc. can be put to the course coordinators and/or your faculty mentor.

## **Instructor Availability**

**Dr. \_\_\_\_\_:**

Monday 2:00-4:00pm (in person)

Tuesday 12:00-1:00pm (via Zoom); 1:00-2:00pm (in K205: lab);

5:00-6:00pm (via Zoom)

Wednesday 2:00-4:00pm (in person)

Friday 11:00am-12:00pm (via Zoom)

\*Zoom office hours will be held in my personal Zoom meeting room and the link to this will be provided on Canvas. In person office hours are in \_\_\_\_\_.

**Dr. \_\_\_\_\_:**

Tuesday/Thursday 11:30 am - 12:30 pm, 3:15 pm – 4:00 pm (in person);

Wednesday 11:30 am - 2:00 pm (in person);

Fri 10:00 am – noon (via Zoom by appointment) .

\*Zoom office hours will be held in my personal Zoom meeting room and the link to this will be provided on Canvas. In person office hours are in \_\_\_\_\_:

## **Communication and Response Time:**

Email is the best way to communicate with us. You are required to use your assigned VCCS email address for all electronic communications. When you e-mail me, please use a proper reference in the “subject” field, detail which course you are enrolled in and sign your name at the bottom of the email. I will respond to emails within 48 hours. Office hours are posted above. My personal “Zoom room” will be used for some of my office hours. The link to this Zoom room can be found on your Canvas site. Appointments are available upon request.

## **Course Description**

To complete this course successfully, a student must demonstrate independent and critical thinking skills through application of the scientific method. Students will select a subject to investigate in cooperation with a faculty mentor, formulate a hypothesis, perform experiments to test the hypothesis, and draw conclusions about the hypothesis. The student is expected to create a poster that describes their project and to present this poster at an end-of-semester seminar. As part of poster production, each student will

create a set of slides of the poster to be archived at PVCC. Each student is expected to consult with the appropriate PVCC lab personnel in a timely manner to order materials and discuss safety issues concerning their experiments.

### **Course Learning Objectives**

As a capstone course, Science 299 is designed to allow students to use all the skills and knowledge they have gained throughout the PVCC Science Program. In Science 299, students will demonstrate:

- independent and critical thinking through the design, execution, and analysis of a research project using appropriate scientific theory and methodology
- a thorough understanding of the applications and basic principles of the instrumentation and/or software vital to their research projects
- the ability to effectively communicate their research ideas and findings both orally and in writing
- a thorough understanding of the scientific principles related to their area of research

### **Course Purpose, Knowledge, Attitude, and Skills**

**Purpose:** Our goal in this course is to offer structure and guidance as you design, conduct, analyze, and present your own research project. This capstone experience allows you to practice scientific techniques and apply knowledge that you learned in previous courses. In Science 299, you will use every step of the scientific process in a complete research cycle. While you work independently, you are part of a research community where you can give and receive feedback and share ideas. We want Science 299 to inform and have a great impact on your academic and professional journey.

**Knowledge:** You will gain expertise in your project area. By the middle of the semester, you will more know more about your topic than anyone else in the class. You will make connections with previous courses in your discipline and solidify some content of your discipline. You will develop your understanding of the scientific process. You will know what scholarly work feels like firsthand.

**Attitude/ability:** In Science 299 you are likely going to gain confidence, develop science identity, be creative, and become more resourceful, tenacious, assertive.

**Skills:** In Science 299, you will learn to think like a scientist by choosing methodology, reframing problems, and learning what you don't know. Since research rarely unfolds as expected, you will likely become more comfortable with failure and rebounding. This humbling experience can also be very exciting as you realize the contours of what is/isn't known in your area of research. You will refine managing time and priorities. You will gain project management skills. Broadly speaking, you will develop a group of transferable skills including building relationships with peers and faculty, honing observation skills, and communicating with diverse audiences.

## Required Textbook(s) and Course Materials

*For this course, you will need a way of keeping organized lab notes (a notebook or a computer). PVCC will provide materials as determined by your approved research plans as well as a professional printed poster for students who submit their poster files on time.*

## Course Website:

Course documents can be found on the course Canvas site. In the event that I need to contact you outside of normal class times, I will send announcements via the Canvas site. Please check the site regularly. Students are responsible for the information contained on the Canvas site.

We recently created a Science 299 website. Some past projects can be viewed here:

<https://sites.google.com/view/science299research/home>

## General grading criteria:

- A. Originality of the project
- B. Amount of effort required to carry out the project
- C. Difficulty of the project
- D. Completion and timeliness of assignment submissions (see due dates in schedule below)
  - Project proposal
  - Presentation abstract
  - Poster
  - Other assignments as required by mentor
- E. Poster presentation:
  - Clarity of poster information
  - Completeness of poster information
  - Visual appeal of poster
  - Ability to present poster to others
- F. Other criteria as determined by your advisor

## Specific grading criteria:

1. Proposal (20% of Course Grade: 15% for final proposal/5% for draft): The proposal should be feasible, logical, well-researched using primary peer-reviewed references, well-reasoned (demonstrate clear understanding of background and where your project fits into existing literature). It should include a thorough methods section with specific protocols that will be used and a list of supplies that indicates what is available at PVCC and what needs to be ordered. Students will write a complete draft of their proposal in which their faculty mentor will provide feedback. Drafts will be graded based on completeness of all sections and submission by the deadline. Students are then to

consider mentor feedback and make edits and submit a final version of their proposal. See proposal information sheet and rubric on our Canvas site and due dates in the schedule below.

2. Abstract (10% of Course Grade: 5% for final abstract/5% for draft): Each abstract will be included in an abstract booklet to be made available on the day of the seminar. One of our group meetings will include information about writing an effective abstract and resources will be available on our Canvas site. Students will write a draft of their abstract in which their faculty mentor will provide feedback. Drafts will be graded based on completeness and submission by the deadline. Students are then to consider mentor feedback and make edits and submit a final version of their abstract. See submission date on the schedule below.
3. Poster (15% of Course Grade: 10% for final poster/5% for draft): Posters should be polished and complete with legible text, tables and figures including titles, labels and captions that allow the poster to stand on its own (i.e. someone with a strong general science background should be able to read your poster without your assistance and understand what your research was about and what you found). For more information on poster construction see available resources on our Canvas page. One of our group meetings will be about constructing an effective poster. A draft must be submitted to your mentor with enough time (see course schedule) for you to print a revised version before the poster session – allow additional 3-5 business days for the printing process. Drafts will be graded on completeness of all sections and submission by the deadline.
4. Poster presentation (10% of Course Grade): Professional attire and behavior are expected. You will be judged on clarity of presentation, how well you answer questions from seminar visitors, and the reports of other science faculty who observe your work.
5. Research (45% of Course Grade: 40% for research conducted, 5% for written mid-term progress report): You will be graded on originality, level of difficulty, regular progress, ingenuity, problem solving, creativity, dedication, and timely communication with your faculty advisor.

### **Course Policies**

- The official class meeting time is Fridays from noon – 12:50. Missing a required class meeting will result in a course grade penalty of up to 10%. Missing more than one required class meeting may result in withdrawal from the course.
- Failure to submit an acceptable proposal by the due date, will result in immediate withdrawal from the course.
- Research mentors are prohibited from offering extensions on submission deadlines. Extensions can only be granted by course coordinators.
- Late submission of drafts or final versions the work listed above may be subject to a 15% deduction of your grade for that assignment.

- Presentation of your research is an important piece of this learning experience. To earn a grade higher than C you must create a poster and partake in the poster session.
- This independent research project is required for graduation. If you do not complete the work associated with this project, you will not be able to graduate with an AS degree in Science from PVCC.
- When you require lab time, the hours you plan to work must be arranged with the associated instructor and/or lab manager. Students are not allowed to work in the labs alone. It is expected for students to respect the busy schedules of both faculty advisors and lab personnel. If you arrange to arrive at a specific time, you should do so. It is possible that students who are late and/or do not appear, will lose the scheduled lab time. Contact your advisor and lab manager if the time you have scheduled changes or if you will be late.
- It is the student's responsibility to clean up the lab space after the completion of their research.
- Once a grade has been made available to students, students have one week to appeal that grade. To appeal an entire course grade, please refer to PVCC policies.

**Course Schedule:** All meetings on the schedule shown below are required. Fridays in which the class cannot meet can be used to work on your research, meet with your mentor, or meet with the coordinators.

| <b>DATE<br/>(Fridays)</b> | <b>Required class<br/>meetings<br/><br/>In K209<br/>(12:00-12:50pm)</b>        | <b>Description</b>                                                                                                                                  | <b>Student Due<br/>Dates</b> | <b>Faculty<br/>Feedback Due<br/>Dates</b> |
|---------------------------|--------------------------------------------------------------------------------|-----------------------------------------------------------------------------------------------------------------------------------------------------|------------------------------|-------------------------------------------|
| 08/27/21                  | Welcome,<br>introductions,<br>course structure,<br>meet with faculty<br>mentor | Faculty led: students<br>will be matched with<br>faculty mentors,<br>then students will<br>meet with faculty<br>mentors and narrow<br>project ideas |                              |                                           |



|          |                                                                                       |                                                                                                               |                                                                                                       |                                                                         |
|----------|---------------------------------------------------------------------------------------|---------------------------------------------------------------------------------------------------------------|-------------------------------------------------------------------------------------------------------|-------------------------------------------------------------------------|
| 09/03/21 | Alumni visit, short summaries of project ideas, safety training                       | Student led: hear from a previous 299 student about the research process. Think about questions you may have! | One-paragraph outline of your project to your faculty mentor via email by start of class.             |                                                                         |
| 09/10/21 | Share proposal topics with group:<br><br>3-4 minute talk about plans                  | Student led: students share their project ideas and approach and make suggestions to peers                    | Proposal draft due on Canvas by start of class.                                                       | Proposal feedback due to students no later than Tuesday 09/14/21 at 5pm |
| 09/17/21 | No class                                                                              | Work on project & reach out if needed!                                                                        | <b>Finished proposal due on Canvas by start of class.</b>                                             |                                                                         |
| 09/24/21 | No class                                                                              | Work on project & reach out if needed!                                                                        |                                                                                                       |                                                                         |
| 10/01/21 | How to incorporate data analysis and appropriate statistics into your research design | Faculty led: What are statistics & why are they important. What options are there?                            | Submit blank data table on Canvas that shows how you will collect and organize data by start of class |                                                                         |
| 10/08/21 | No class                                                                              | Work on project & reach out if needed!                                                                        |                                                                                                       |                                                                         |

|          |                                                               |                                                                                                                                           |                                                         |                                                                       |
|----------|---------------------------------------------------------------|-------------------------------------------------------------------------------------------------------------------------------------------|---------------------------------------------------------|-----------------------------------------------------------------------|
| 10/15/21 | No class                                                      | Are you collecting data on your project yet (you should be!)?                                                                             |                                                         |                                                                       |
| 10/22/21 | Project updates – oral presentation to class, written summary | Student led: Students will provide their peers with an update on their progress, issues they encountered, and provide feedback to others. | Written Mid-term report due on Canvas by start of class |                                                                       |
| 10/29/21 | No class                                                      | Work on project & reach out if needed!                                                                                                    |                                                         |                                                                       |
| 11/05/21 | No class                                                      | Work on project & reach out if needed!                                                                                                    |                                                         |                                                                       |
| 11/12/21 | How to design a presentation; alumni visit                    | Hear from a previous 299 student about presenting their research. Come with questions!                                                    |                                                         |                                                                       |
| 11/19/21 | No class                                                      | Work on presentation & reach out if needed!                                                                                               | <b>Draft of poster due by 12pm on Friday 11/19</b>      | Poster feedback due to students no later than Tuesday 11/23/21 at 5pm |

|          |                                                                                    |                                                                                                                                                              |                                                                 |                                                                        |
|----------|------------------------------------------------------------------------------------|--------------------------------------------------------------------------------------------------------------------------------------------------------------|-----------------------------------------------------------------|------------------------------------------------------------------------|
| 11/26/21 | Thanksgiving: No class                                                             | Work on presentation & reach out if needed!                                                                                                                  |                                                                 |                                                                        |
| 12/03/21 | Poster presentation practice                                                       | Student led: Students will practice presenting their posters to 1 other student and 1-2 faculty members. *please bring your computer with your poster on it* | <b>Final poster &amp; abstract drafts due by start of class</b> | Abstract feedback due to students no later than Sunday 12/05/21 at 5pm |
| 12/10/21 | <b>Poster Session</b><br><b>11:30am – 1:30pm</b><br><b>North Mall Meeting Room</b> |                                                                                                                                                              | <b>NOTE: Abstract due Tuesday 12/07/21 at 12pm!</b>             |                                                                        |
